# Supplementary material for: Detection of Exotic Mosquito Species (Diptera: Culicidae) at International Airports in Europe
Source: PubMed Central journal article supplement (PMC7277938; doi:10.3390/ijerph17103450), 2020-05-15
Supplement: ijerph-17-03450-s001.pdf [file ijerph-17-03450-s001.pdf]

## Supplementary material

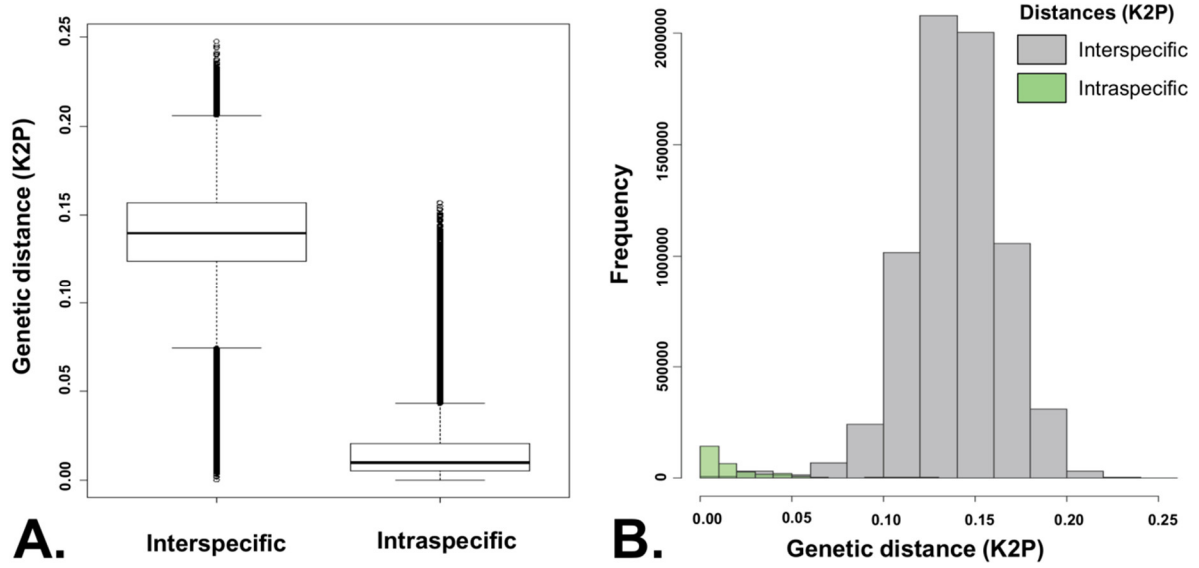

Figure S1. Evaluation of barcode gap in the dataset (species listed in Table S3, 2,721 COI sequences included). A. Boxplot of the inter- and intraspecific genetic distances, indicating the existence of a barcode gap, with interspecific distance being larger than intraspecific distance. The median is indicated by the horizontal line and the range as the vertical dashed lines (upper and lower 1.5 IQR quartiles). Outliers are displayed as open circles (due to overlap, they look like bold vertical lines). Box represents the upper and lower quartiles; B. Frequency of pairwise comparisons against base substitution per site (K2P).

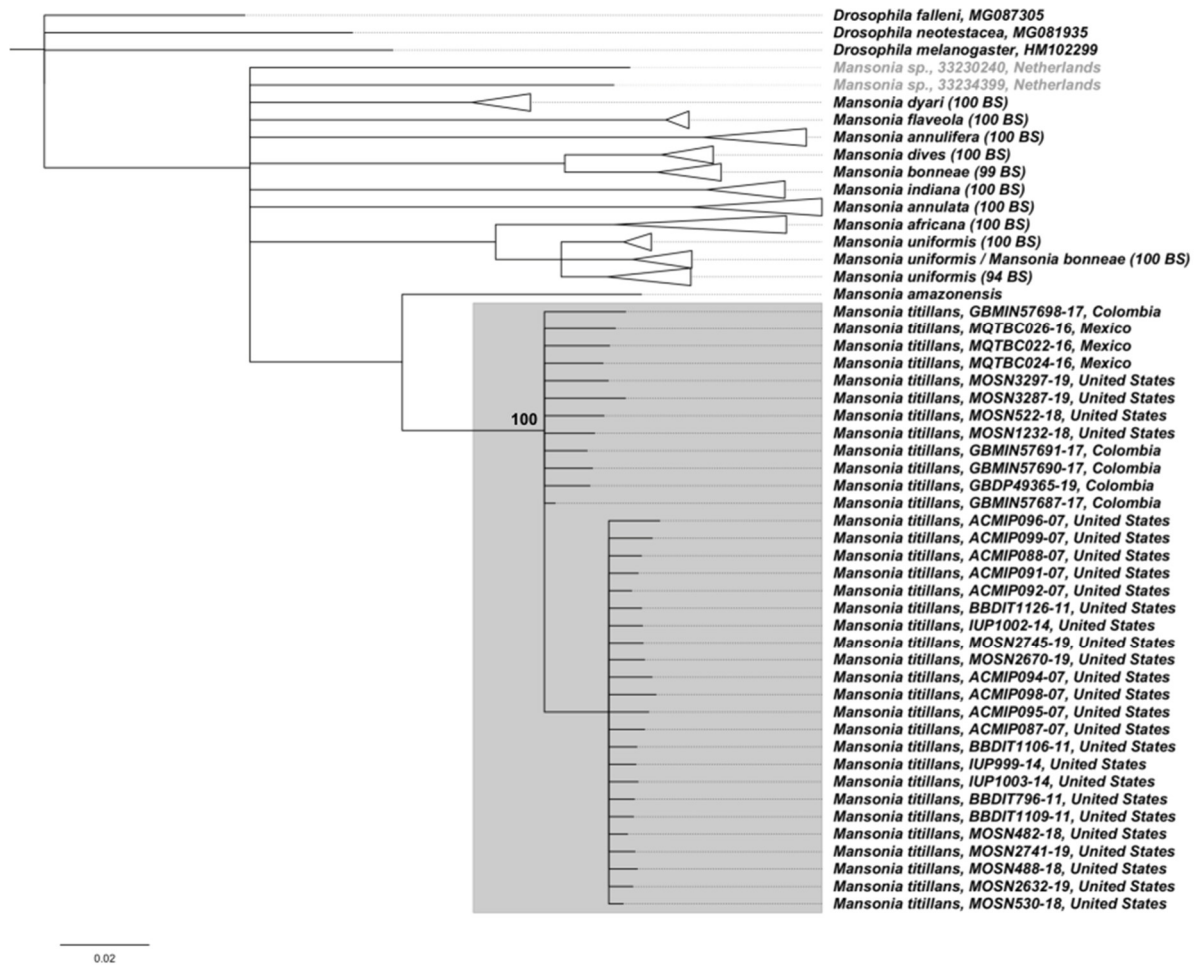

Figure S2. Neighbour-Joining tree including 11 *Mansonia* species based on COI (K2P; 658 bp fragment; 227 barcodes). The bootstrap values (BS; 500 replicates) are shown in the tip labels for the collapsed sequence clusters, while they are displayed at the branch points for the non-collapsed species (sequences of query specimens highlighted in grey). Clusters were collapsed to make the overall tree visually clearer. Minimum bootstrap displayed is 75, other branches are collapsed.

Table S1. Table reporting the primers involved for the amplification of the three DNA regions. References in the manuscript.

| Primer    | Sequence                         | Reference                  | DNA region         |
|-----------|----------------------------------|----------------------------|--------------------|
| LCO1490   | 5'-GGTCAACAAATCATAAAGATATTGG-3'  | Folmer <i>et al.</i> 1994  | Mitochondrial COI  |
| HCO2198   | 5'-TAAACTTCAGGGTGACCAAAAAATCA-3' | Folmer <i>et al.</i> 1994  | Mitochondrial COI  |
| 5.8S      | 5'-TGTGAACTGCAGGACACATG-3'       | Collins and Paskewitz 1996 | Nuclear ITS2       |
| 28S       | 5'-ATGCTTAAATTTAGGGGGTA-3'       | Collins and Paskewitz 1996 | Nuclear ITS2       |
| N4J-8502D | 5'-CGTAGGAGGAGCAGCTATATT-3'      | Fonseca <i>et al.</i> 2001 | Mitochondrial nad4 |
| N4N-8944D | 5'-AAGGCTCATGTTGAAGCTCC-3'       | Fonseca <i>et al.</i> 2001 | Mitochondrial nad4 |

Table S2. PCR cycling conditions used for the amplification of the three DNA regions.

|      | Initial denaturation | Denaturation                 | Annealing                    | Elongation                   | Final elongation | Cycles  |
|------|----------------------|------------------------------|------------------------------|------------------------------|------------------|---------|
| COI  | 94 °C - 3 min        | 94 °C - 30 s<br>94 °C - 30 s | 45 °C - 30 s<br>51 °C - 60 s | 72 °C - 60 s<br>72 °C - 60 s | 72 °C - 10 min   | 5<br>35 |
| ITS2 | 94 °C - 3 min        | 94 °C - 30 s                 | 46 °C - 30 s                 | 72 °C - 45 s                 | 72 °C - 7 min    | 35      |
| nad4 | 94 °C - 3 min        | 94 °C - 30 s                 | 55 °C - 40 s                 | 72 °C - 50 s                 | 72 °C - 10 min   | 35      |

Table S3. List of mosquito species occurring in Belgium and the Netherlands, including the overall maximum observed intraspecific Kimura two-parameter (K2P) distances among COI sequences. The K2P values in brackets were calculated based on a database that included the four query COI sequences. The checklist of species was compiled from a literature review, using the publications of [4], [23]–[32], and includes the four new species identified within this study (highlighted in bold). (\*) indicates the sequences were extracted from GenBank. If not specified, sequences were extracted from BOLD (public). n.a.: not applicable.

| Subfamily   | Tribe  | Genus                            | Subgenus                                     | Species                                           | Belgium | Netherlands | Number of COI sequences included in the analyses | Average inter-specific K2P distance (%) | Max observed K2P distance between conspecific sequences (%) |
|-------------|--------|----------------------------------|----------------------------------------------|---------------------------------------------------|---------|-------------|--------------------------------------------------|-----------------------------------------|-------------------------------------------------------------|
| Anophelinae |        | <i>Anopheles</i><br>Meigen, 1818 | <i>Anopheles</i><br>Meigen, 1818             | <i>algeriensis</i><br>Theobald, 1903              |         | √           | 8                                                | 12.19                                   | 6.33                                                        |
|             |        |                                  |                                              | <i>atroparvus</i><br>Van Thiel, 1927              | √       | √           | 18                                               | 2.49                                    | 1.51                                                        |
|             |        |                                  |                                              | <i>claviger</i><br>(Meigen, 1804)                 | √       | √           | 14                                               | 11.20                                   | 3.83                                                        |
|             |        |                                  |                                              | <b><i>crucians</i></b><br><b>Wiedemann, 1828</b>  |         | √           | <b>21 (22)</b>                                   | <b>8.15 (8.14)</b>                      | <b>5.30 (5.50)</b>                                          |
|             |        |                                  |                                              | <i>maculipennis</i><br>Meigen, 1818               | √       | √           | 14                                               | 2.28                                    | 2.71                                                        |
|             |        |                                  |                                              | <i>melanoon</i><br>Hackett, 1934                  |         | √           | 1*                                               | 1.86                                    | n.a.                                                        |
|             |        |                                  |                                              | <i>messeae</i><br>Falleroni, 1926                 | √       | √           | 75                                               | 2.73                                    | 2.81                                                        |
|             |        |                                  |                                              | <b><i>pharoensis</i></b><br><b>Theobald, 1901</b> | √       |             | <b>4 (5)</b>                                     | <b>12.95 (12.98)</b>                    | <b>1.32 (1.75)</b>                                          |
|             |        |                                  |                                              | <i>plumbeus</i><br>Stephens, 1828                 | √       | √           | 13                                               | 13.76                                   | 0.47                                                        |
|             |        |                                  |                                              | <b><i>subpictus</i></b><br><b>Grassi, 1899</b>    |         | √           | <b>65 (66)</b>                                   | <b>10.86 (10.86)</b>                    | <b>14.72 (14.72)</b>                                        |
| Culicinae   | Aedini | <i>Aedes</i><br>Meigen, 1818     | <i>Aedes</i><br><i>Aedes</i><br>Meigen, 1818 |                                                   | √       | 158         | 9.21                                             | 3.09                                    |                                                             |
|             |        |                                  | <i>cinereus</i><br>Meigen, 1818              | √                                                 | √       | 307         | 11.84                                            | 5.56                                    |                                                             |
|             |        |                                  | <i>Aedimorphus</i><br>Theobald, 1903         | √                                                 | √       | 437         | 0.97                                             | 4.62                                    |                                                             |
|             |        |                                  | <i>Dahlia</i><br><i>geniculatus</i>          | √                                                 | √       | 15          | 9.88                                             | 1.71                                    |                                                             |

|            |                                   |                                                           |                                         |   |   |  |     |       |       |
|------------|-----------------------------------|-----------------------------------------------------------|-----------------------------------------|---|---|--|-----|-------|-------|
|            |                                   | Reinert, Harbach & Kitching, 2006                         | (Olivier, 1791)                         |   |   |  |     |       |       |
|            |                                   | <i>Georgecraigus</i><br>Reinert, Harbach & Kitching, 2006 | <i>atropalpus</i><br>(Coquillett, 1902) |   | ✓ |  | 5   | 9.76  | 1.14  |
|            |                                   | <i>Hulecoeteomyia</i><br>Theobald, 1904                   | <i>japonicus</i><br>(Theobald, 1901)    | ✓ | ✓ |  | 52  | 9.44  | 9.65  |
|            |                                   |                                                           | <i>koreicus</i><br>(Edwards, 1917)      | ✓ |   |  | 6   | 7.05  | 0.74  |
|            |                                   | <i>Ochlerotatus</i><br>Lynch<br>Arribálzaga,<br>1891      | <i>annulipes</i><br>(Meigen, 1830)      | ✓ | ✓ |  | 12  | 1.01  | 2.01  |
|            |                                   |                                                           | <i>cantans</i><br>(Meigen, 1818)        | ✓ | ✓ |  | 10  | 0.33  | 1.30  |
|            |                                   |                                                           | <i>caspicus</i><br>(Pallas, 1771)       | ✓ | ✓ |  | 27  | 1.98  | 2.83  |
|            |                                   |                                                           | <i>communis</i><br>(De Geer, 1776)      | ✓ | ✓ |  | 207 | 2.85  | 5.68  |
|            |                                   |                                                           | <i>detritus</i><br>Haliday, 1833        | ✓ | ✓ |  | 4   | 7.74  | 1.11  |
|            |                                   |                                                           | <i>dorsalis</i><br>(Meigen, 1830)       | ✓ | ✓ |  | 95  | 1.31  | 1.26  |
|            |                                   |                                                           | <i>excrucians</i><br>(Walker, 1856)     |   | ✓ |  | 80  | 0.85  | 2.45  |
|            |                                   |                                                           | <i>flavescens</i><br>(Müller, 1764)     | ✓ | ✓ |  | 17  | 2.61  | 5.97  |
|            |                                   |                                                           | <i>leucomelas</i><br>(Meigen, 1804)     |   | ✓ |  | 2   | 8.72  | 0.40  |
|            |                                   |                                                           | <i>nigrinus</i><br>(Eckstein, 1918)     |   | ✓ |  | 2   | 0.30  | 0.77  |
|            |                                   |                                                           | <i>punctor</i><br>(Kirby, 1837)         | ✓ | ✓ |  | 31  | 4.61  | 5.85  |
|            |                                   |                                                           | <i>riparius</i><br>Dyar & Knab, 1907    |   | ✓ |  | 7   | 4.53  | 2.20  |
|            |                                   |                                                           | <i>sticticus</i><br>(Meigen, 1838)      | ✓ | ✓ |  | 250 | 5.86  | 10.76 |
|            |                                   |                                                           | <i>rusticus</i><br>(Rossi, 1790)        | ✓ | ✓ |  | 4   | 6.97  | 0.27  |
|            |                                   | <i>Stegomyia</i><br>Theobald, 1901                        | <i>albopictus</i><br>(Skuse, 1895)      | ✓ | ✓ |  | 215 | 11.09 | 12.38 |
| Culicini   | <i>Culex</i><br>Linnaeus,<br>1758 | <i>Barraudius</i><br>Edwards, 1921                        | <i>modestus</i><br>Ficalbi, 1890        |   | ✓ |  | 33  | 5.45  | 4.74  |
|            |                                   | <i>Culex</i><br>Linnaeus, 1758                            | <i>pipiens</i><br>Linnaeus, 1758        | ✓ | ✓ |  | 103 | 2.19  | 7.63  |
|            |                                   |                                                           | <i>torrentium</i><br>Martini, 1925      | ✓ | ✓ |  | 99  | 1.82  | 0.90  |
|            |                                   | <i>Neoculex</i><br>Dyar, 1905                             | <i>territans</i><br>Walker, 1856        | ✓ | ✓ |  | 181 | 9.43  | 6.63  |
|            |                                   | <i>Maillotia</i><br>Theobald, 1907                        | <i>hortensis</i><br>Ficalbi, 1889       | ✓ |   |  | 9   | 8.87  | 0.85  |
| Culisetini | <i>Culiseta</i><br>Felt, 1904     | <i>Culicella</i><br>Felt, 1904                            | <i>fumipennis</i><br>(Stephens, 1825)   | ✓ | ✓ |  | 5   | 4.15  | 9.04  |
|            |                                   |                                                           | <i>morsitans</i><br>(Theobald, 1901)    | ✓ | ✓ |  | 76  | 6.83  | 9.99  |
|            |                                   |                                                           | <i>ochroptera</i><br>Peus, 1935         |   | ✓ |  | 2   | 10.50 | 2.27  |
|            |                                   | <i>Culiseta</i><br>Felt, 1904                             | <i>alaskaensis</i><br>(Ludlow, 1906)    |   | ✓ |  | 9   | 4.09  | 0.63  |
|            |                                   |                                                           | <i>annulata</i><br>(Schränk, 1776)      | ✓ | ✓ |  | 10  | 2.13  | 0.27  |
|            |                                   |                                                           | <i>subochrea</i><br>(Edwards, 1921)     | ✓ | ✓ |  | 1   | 2.01  | n.a.  |
| Mansoniini | <i>Coquillettida</i>              | <i>Coquillettida</i>                                      | <i>richiardii</i>                       | ✓ | ✓ |  | 10  | 13.31 | 0.55  |

|  |                    |                                                      |                                        |                                        |   |  |    |       |      |
|--|--------------------|------------------------------------------------------|----------------------------------------|----------------------------------------|---|--|----|-------|------|
|  |                    | Dyar, 1905                                           | Dyar, 1905                             | (Ficalbi, 1889)                        |   |  |    |       |      |
|  | Orthopodomyi<br>ni | <i>Orthopodomyi</i><br><i>a</i><br>Theobald,<br>1904 | <i>Orthopodomyia</i><br>Theobald, 1904 | <i>pulcripalpis</i><br>(Rondani, 1872) | √ |  | 1* | 12.05 | n.a. |

Table S4. Results of the species identifications obtained using the BOLD and BLAST (GenBank) search engines. Nad4 blasting results were inconclusive because there are presently no nad4 sequences of the identified species (based on COI) in the online repository GenBank. There are at present no published COI sequences of *Anopheles crucians* in GenBank. n.a.: no sequencing product.

| Sample ID | BOLD species match and similarity %   | BLAST (GenBank) species match and similarity % |                                       |                    |
|-----------|---------------------------------------|------------------------------------------------|---------------------------------------|--------------------|
|           |                                       | COI                                            | ITS2                                  | nad4               |
| 05894947  | <i>Anopheles crucians</i><br>99.60%   | <i>Anopheles sp.</i><br>92.70%                 | <i>Anopheles crucians</i><br>99.68%   | Inconclusive < 90% |
| 05899545  | <i>Anopheles subpictus</i><br>100%    | <i>Anopheles subpictus</i><br>100%             | <i>Anopheles subpictus</i><br>99.22%  | Inconclusive < 90% |
| 33230240  | Inconclusive < 90%                    | Inconclusive < 90%                             | Inconclusive < 90%                    | Inconclusive < 90% |
| 33234399  | Inconclusive < 90%                    | Inconclusive < 90%                             | Inconclusive < 90%                    | n.a.               |
| M17M0017  | <i>Anopheles pharoensis</i><br>99.08% | <i>Anopheles pharoensis</i><br>99.09%          | <i>Anopheles pharoensis</i><br>99.63% | Inconclusive < 90% |
